# Supplementary material for: Quality of life of children with short bowel syndrome and their caregivers from the perspective of caregivers: a cross-sectional study in China
Source: Research Square preprint supplement (doi:10.21203/rs.3.rs-8216812/v1), 2025-12-05
Supplement: Supplementary file 1 [file b16153b27224da60dec5f874.xlsx]

## Sheet: 统计用
Patient_name	Birthday	Gender	Quiz_person	Only_one_child	marriage	Mother_education	Father_education	Job	Income	burdon	location	caregiver	Insurance	Cost	Charity	pregnant_age	gestagation	birth_wt	age_onset	re_age_onset	etiology	re_etiology	bowel_length	re_bowel_length	operation_time	re_operation	malformation	HT	WT	Off_PN	PN_duration	re_PN_duration	PN_age	body_develop	Neuro_develop	school_record	Choice	EQ1.1body	EQ1.2play	EQ1.3pain	EQ1.4soc	EQ1.5com	EQ1.6eat	EQ1total_score	Ped1.1phy	Ped1.2phy	Ped1.3phy	Ped1.4phy	Ped1.5phy
马怡凯	2019-03-09	1	1	2	1	3	3	2	3	1	1	1	1	4	1	28	38	3.5	2岁	2	肠旋转不良、肠扭转坏死	2	35	3	3	2	1	113	20	1	32	3	2岁	1	1	1	4
郝露娜	2021-03-29	2	1	1	1	4	4	2	4	1	1	2	1	4	2	34	34	2.33	10天	1	NEC	3	40	2	2	2	1	100	14.4	1	13	3	1个月	2	2	1	3
万逸阳	2013-02-03	1	1	1	1	4	4	1	3	2	1	1	1	3	2	39	40	3.75	7岁	2	肠扭转	2	80	3	2	2	1	140	28	1	4	1	6岁	3	2	2	5
谭智恩	2019-08-27	1	1	2	1	4	4	2	2	1	1	2	1	4	2	31	39	3.35	12个月	2	肠旋转不良、肠扭转坏死	2	30	2	5	1	2	101	17.5	2	50	3	12个月	2	3	1	3
张锦荣	2021-11-17	1	1	2	1	4	4	2	5	1	1	1	1	4	2	37	36	3.51	1天	1	肠闭锁	1	80	3	6	1	1	93	12.4	1	14	3	0月	3	2	1	3
黄婧可	2021-05-07	2	1	1	1	5	4	1	4	2	1	1	1	3	2	30	39	3.6	7天	1	NEC	3	60	3	3	2	1	102	15.2	1	24	3	6个月	2	1	2	3
高一凡	2022-08-19	1	1	2	1	4	4	1	2	1	1	1	1	4	1	35	36	1.9	1天	1	先天性短肠	5	11	1	2	2	1	80	9	2	22	3	3天	3	2	1	3
朱甲彤	2020-07-27	2	2	2	1	2	2	1	2	1	2	1	1	2	2	24	35	3.12	2天	1	肠闭锁	1	40	2	3	2	1	108	17	1	8	2	1个月	2	2	3	3
杨梓萌	2017-04-12	2	2	2	1	4	4	1	1	1	1	2	1	2	2	28	39	2.55	46个月	2	肠坏死，肠穿孔	2	60	3	1	2	2	120	22.5	1	12	2	46个月	3	1	2	4
肖子睿	2019-03-04	1	1	2	1	3	2	2	2	1	2	2	1	3	1	31	36	3	1天	1	肠闭锁	1	75	3	1	2	1	113	18	1	3	1	1天	2	2	3	4
王子健	2019-04-27	1	2	2	1	4	4	1	2	1	1	2	1	4	1	37	37	2.6	1天	1	先天性肠闭锁	1	30	2	7	1	1	91	12	1	39	3	1天	3	3	4	4
陈梓萱	2021-07-19	2	2	1	1	4	4	2	3	1	1	2	1	3	1	32	27	0.85	1.5个月	2	NEC	3	100	3	3	2	1	96	13	1	5	1	1天	3	3	1	3
毕健宁	2018-10-28	1	1	1	1	4	4	1	1	1	2	2	1	4	1	28	31	1.8	15天	1	NEC	3	70	3	3	2	1	110	15	1	6	2	15天	3	2	2	4
朱芸希	2018-11-21	2	2	2	1	4	3	2	2	1	2	2	1	4	2	28	40	3.3	1天	1	肠扭转	2	100	3	1	2	1	110	15.5	2	10	2	1岁	3	3	3	4
邢紫俊	2012-11-03	1	1	2	1	2	2	2	1	1	1	2	2	4	1	21	31	4.1	64个月	2	肠扭转肠坏死	2	18.5	1	3	2	1	130	21	2	80	3	64个月	3	2	3	6
刘方知	2018-09-17	1	1	2	1	4	4	2	2	1	2	1	1	4	2	28	37	1.8	1.5个月	2	NEC	3	51	3	5	1	2	110	14	1	6	2	45天	3	3	1	4
陈欣怡	2019-11-17	2	1	2	1	4	4	1	3	1	1	1	1	2	2	35	37	2.65	2天	1	肠旋转不良导致坏死	2	35	2	1	2	2	105	17.5	1	2.5	1	2天	2	1	1	4
阮泽林	2020-10-30	1	2	1	1	4	4	3	2	1	1	2	1	4	1	35	38	3.15	1天	1	先天性巨结肠	4	70	3	2	2	1	100	15.3	1	48	3	1 天	3	3	1	3
王馨彤	2016-04-18	2	1	2	1	3	2	2	2	1	1	2	1	4	2	36	36	2.3	1天	1	肠闭锁	1	61	3	3	2	2	127	24	1	4	1	5天	2	2	3	5
冯嘉伊	2020-05-10	2	1	2	1	4	4	2	3	1	1	2	1	4	2	35	32	2	1天	1	肠闭锁	1	58	3	1	2	1	107	16	1	6	2	3天	3	2	1	3
符灵韵	2019-07-30	2	1	1	1	4	4	1	4	2	1	1	1	4	2	33	34	2.65	1天	1	肠扭转肠坏死	2	50	2	2	2	1	114	17.5	1	5	1	1天	2	2	3	4
渐智泳	2022-09-08	1	1	1	1	4	4	2	2	1	1	1	1	3	2	31	31	1.7	1个月	2	肠扭转	2	15	1	2	2	1	78	9.1	1	10	2	1个月	3	3	3	3
杨毓子	2020-02-13	2	1	1	1	5	4	1	5	2	1	1	1	4	2	40	32	1.8	1天	1	肠闭锁	1	20	1	2	2	1	106	15	1	8	2	1天	2	2	2	3
严梓洋	2019-05-27	2	1	1	1	4	3	1	3	1	1	1	1	3	2	33	34	1.9	7天	1	NEC	3	70	3	3	2	1	105	16	1	5	1	1个月	3	2	1	4
单鑫泽	2018-05-27	1	1	1	3	4	5	1	4	1	1	1	1	3	1	27	31	1.4	1.2个月	2	NEC	3	50	2	3	2	1	105	17	1	10	2	1.2个月	3	3	4	4
陈珊儒	2017-08-09	2	2	2	1	4	4	1	2	1	2	1	1	3	1	27	36	2.55	10天	1	先天性短肠	5	65	3	1	2	1	98	12.9	1	3	1	1个月	3	3	2	4
王雅欣	2014-07-16	2	2	2	1	2	3	2	2	1	2	2	1	4	2	24	36	2.65	3岁	2	肠扭转	2	20	1	3	2	1	130	21	1	6	2	3岁	3	2	4	5
顾子墨	2017-04-13	1	1	1	1	4	4	1	4	1	1	1	1	3	1	28	35	2.05	9天	1	NEC	3	80	3	3	2	1	135	22	1	3	1	10天	3	3	3	5
邓卿甜	2020-10-20	2	2	1	1	4	5	1	4	2	1	1	1	4	2	26	40	3.5	1天	1	肠闭锁	1	45	2	1	2	1	100	14	1	3	1	2天	3	1	1	3
陈柯亦	2020-06-07	1	1	2	1	4	3	1	3	2	2	1	1	4	2	32	38	3.35	3天	1	肠旋转不良，肠扭转	2	28	2	3	2	1	105	17.5	1	4	1	4天	2	2	3	3
尹星媛	2019-12-13	2	1	1	1	4	3	1	2	1	1	1	1	2	1	24	34	2	10天	1	NEC	3	50	2	4	1	1	106	14.48	1	3	1	1天	3	2	1	4
肖宇钢	2019-12-07	1	2	2	1	2	3	2	1	1	2	1	1	3	1	31	39	3.9	2天	1	NEC	3	50	2	4	1	1	105	30	1	10	2	3天	3	2	3	4
胡铭城	2013-12-19	1	1	2	1	5	5	1	3	1	1	1	1	4	2	30	40	3.9	1岁10月	2	肠旋转不良	2	5	1	2	2	2	121	17.8	2	108	3	1岁十个月	3	3	4	5
张子林，丁玲玲之子	2016-12-18	1	2	1	1	5	5	1	4	2	1	1	1	4	2	32	38	3.15	1天	1	肠闭锁	1	60	3	2	2	1	123	20.8	2	6	2	1天	3	1	2	4
郭程宇	2017-08-13	1	2	2	1	4	4	2	2	1	1	2	1	4	2	30	30	1.4	2个月	2	NEC	3	40	2	3	2	1	140	22	1	6	2	3天	3	3	4	4
张家孟	2016-10-07	1	2	1	1	5	4	1	4	1	1	1	1	4	2	29	33	1.9	1天	1	肠穿孔	6	75	3	5	1	1	120	16	1	8	2	5天	3	3	4	5
林裕祥	2016-12-03	1	1	2	1	4	4	1	4	1	1	1	1	4	2	31	32	1.16	7天	1	肠扭转肠坏死	2	25	2	6	1	2	115	18	1	12	2	7天	3	3	3	5
李梓桐	2016-09-26	1	2	1	1	2	2	2	2	1	2	2	1	4	1	20	37	3.4	1天	1	肠闭锁	1	40	2	2	2	1	128	22	1	6	2	4天	3	2	2	5
黄雄	2018-04-26	1	1	2	1	4	2	1	3	1	2	1	1	3	1	42	35	2.8	1天	1	肠旋转不良伴肠扭转	2	40	2	2	2	1	112	17	1	7	2	38天	3	3	4	4
施星杰	2018-09-23	1	2	2	1	2	2	1	1	1	2	1	1	4	1	29	34	1.6	4天	1	内疝	6	45	2	4	1	1	105	18	2	12	2	7天	2	2	1	4
廖书妍	2018-09-16	2	2	2	1	4	3	1	2	1	2	1	1	4	1	23	39	2.8	1个月内	1	肠闭锁	1	30	2	3	2	1	114	16	1	5	1	1个月	3	2	3	4
杜佰恩	2018-09-10	1	2	2	1	2	2	2	2	1	2	2	1	4	1	28	37	2.6	1天	1	先天性肠扭转肠坏死	2	50	2	6	1	1	109	22	2	60	3	2天	2	1	1	4
李雨岑	2019-08-02	2	1	1	1	4	4	3	4	2	1	1	1	4	2	29	28	0.98	2周	1	NEC	3	110	3	4	1	1	106	16.5	1	10	2	1天	2	1	2	4
张乐然	2022-11-07	2	1	1	1	4	4	1	4	1	1	1	1	4	2	28	34	2.24	1天	1	肠扭转	2	35	2	1	2	1	82	10	1	12	2	0月	3	2	1	3
陈安睿	2019-09-26	1	1	2	1	5	5	1	3	1	1	1	1	4	2	37	41	3.6	3个月	2	先天性巨结肠	4	80	3	6	1	1	100	14.5	1	11	2	3个月	3	2	1	4
戚胜博	2014-11-04	1	2	2	1	3	4	2	2	2	1	2	1	3	2	24	33	2.7	26天	1	NEC	3	36	2	2	2	1	138	28	1	3	1	1个月	2	2	3	5
陈勃光	2010-05-18	1	1	1	1	4	4	1	3	1	1	2	1	4	2	30	39	2.2	4岁	2	肠扭转	2	80	3	5	1	1	157	31	1	36	3	4岁	3	2	2	6
闫泓言	2018-03-28	2	2	1	1	4	5	1	3	1	1	1	1	3	2	30	37	2.81	1天	1	肠闭锁	1	60	3	1	2	1	120	7	1	12	2	1岁	3	2	2	4
邢程	2016-01-07	1	2	1	1	2	2	2	2	1	1	1	1	3	2	21	38	3.24	1天	1	肠扭转、肠坏死	2	50	2	1	2	1	145	40	1	1.5	1	3天	1	2	2	5
廖秋阳	2015-11-07	1	1	2	1	1	4	1	3	2	1	1	1	3	2	36	35	3.65	1天	1	肠闭锁	1	55	3	2	2	1	135	26	1	6	2	10个月	2	2	2	5
陈皓	2015-06-16	1	1	2	3	4	4	3	1	1	2	2	1	4	2	25	40	3	1天	1	肠扭转	2	45	2	2	2	2	130	25	1	7	2	6天	3	2	4	5
黄锦煜	2018-04-03	1	1	2	1	1	1	1	1	1	2	2	1	4	2	40	32	1.53	1天	1	肠闭锁	1	45	2	1	2	1	110	20	1	24	3	出生	3	3	1	4
张若琳	2016-05-29	2	1	2	1	4	4	1	2	1	1	1	1	3	2	26	35	2.4	1天	1	肠闭锁	1	40	2	1	2	1	125	21	1	3	1	1天	3	1	3	5
邹宇轩	2016-04-12	1	2	2	1	2	3	1	3	2	2	1	1	2	2	26	39	2.4	2天	1	肠扭转不良导致肠坏死	2	50	2	1	2	1	127	23	1	2	1	3个月	3	2	4	5
黄启轩	2012-03-16	1	2	2	1	4	4	1	4	1	1	1	1	4	2	26	38	3.6	1岁10个月	2	肠扭转	2	23	1	6	1	1	152	37	2	130	3	1岁10月	3	2	2	5
杨弘驹	2014-10-18	1	1	1	1	4	4	1	2	1	1	1	1	2	2	30	40	3.6	2个月	2	肠系膜血管发育异常，肠扭转	6	35	2	2	2	1	128	26	1	2.5	1	1个月	3	2	4	5
郑郭祥	2010-05-01	1	1	2	1	2	2	1	3	1	1	2	1	3	2	30	40	3.5	5天	1	先天性巨结肠	4	70	3	2	2	1	165	63	1	1.5	1	5个月后	2	2	2	6
陈铭喆	2016-01-02	1	1	2	1	4	4	2	4	1	1	2	1	4	2	34	38	3	12d	1	小肠闭锁	1	50	2	3	2	1	136	30	1	7	2	4天	2	1	2	5
宋恒毅	2010-10-21	1	1	2	1	4	4	1	4	1	1	1	1	4	1	30	39	4	1天	1	肠闭锁	1	80	3	3	2	1	156	43	1	24	3	1天	3	2	4	6
王思媛	2010-01-07	2	2	2	1	5	5	1	5	1	1	2	1	4	1	29	36	2.5	3天	1	梅克尔憩室，消化道穿孔	6	80	3	5	1	1	168	55	2	24	3	3个月	2	2	4	6
徐薪然	2016-07-21	2	1	2	1	2	2	1	2	1	2	2	1	4	2	36	31	1.46	12d	1	NEC	3	80	3	2	2	1	137	24	1	1.5	1	2天	2	2	3	5
商馨予	2020-08-27	2	2	1	1	5	4	1	4	1	1	1	1	4	2	31	37	2.7	3d	1	肠闭锁	1	80	3	5	1	2	109	17	1	6	2	1个月	2	2	1	3
黄艺凌	2015-01-16	2	3	2	1	4	3	1	3	1	1	1	1	4	2	34	38	3.4	5岁9个月	2	肠旋转不良 肠扭转	2	15	1	3	2	2	143	30	2	46	3	5岁9个月	2	2	1	5
李浩然	2017-05-24	1	1	2	1	2	2	1	1	1	2	2	1	4	1	28	38	4	6岁	2	肠扭转	2	75	3	5	1	1	123	25.3	1	11	2	6岁	3	3	1	4
梁智笙	2022-02-09	1	2	1	1	4	4	3	2	1	1	1	1	4	1	32	33	1.5	3日	1	NEC	3	40	2	4	1	1	84	10.7	2	52	3	10天	3	3	1	3
张	2022-08-18	1	1	1	1	5	5	1	4	1	1	1	1	4	2	25	40	3	4月	2	NEC	3	45	2	3	2	1	150	22	1	245	3	4月	1	1	2	3
吴谦墨	2022-10-04	1	1	1	1	4	4	2	3	1	1	2	1	2	1	29	39	3.2	7个月	2	肝移植术后肠坏死	6	60	3	3	2	1	83	11.5	1	2	1	1岁	2	2	1	3
王胜峻	2022-04-20	1	1	2	1	4	4	1	3	1	1	1	1	3	2	37	32	2.36	1天	1	胎粪性腹膜炎	6	80	3	3	2	1	92	12	1	6	2	1个月	1	1	1	3
吴予墨	2022-06-11	2	2	1	1	4	4	1	2	1	2	1	1	4	1	27	37	2.5	1个月26天	2	NEC	3	50	2	4	1	1	84	10	1	13	3	3个月	3	2	1	3
时瑞泽	2022-09-12	1	2	1	1	4	4	1	3	1	2	1	1	3	2	27	37	3.48	1天	1	肠闭锁	1	65	3	3	2	1	85	10.9	1	6	2	2天	3	2	1	3
李径语	2022-09-06	1	1	2	1	2	3	2	1	1	2	1	1	3	1	33	33	1.6	16天	1	NEC	3	50	2	2	2	1	87	12.5	1	8	2	16天	1	1	1	2
袁开昱	2023-11-22	1	1	2	1	1	2	2	1	1	2	2	1	4	1	35	27	1.1	1.1个月	2	NEC	3	65	3	2	2	1	70	7	2	5	1	1个月	3	2	1	1	1	1	1	1	1	1	70	2	2	2	2	2
程泽庭	2023-12-27	1	1	2	1	4	4	2	3	1	1	1	1	4	2	29	31	0.97	2天	1	NEC	3	60	3	2	2	1	70	6.85	1	5	1	3天	3	2	1	1	1	1	1	1	1	1	100	1	1	1	1	1
覃昱珵	2024-03-16	1	2	1	1	5	4	1	3	1	1	1	1	4	1	35	29	1.17	1天	1	肠闭锁	1	80	3	3	2	1	59	4.5	2	8	2	1天	3	3	1	1	2	1	2	2	2	2	70	3	3	3	3	2
程瑾汐	2024-07-29	2	1	2	1	4	4	1	1	1	1	1	1	2	2	26	35	2.06	0个月	1	NEC	3	23	1	1	2	1	56	3.51	2	3	1	3天	3	2	1	1	1	1	2	1	1	1	100	1	1	1	1	1
郭苏瑶	2023-03-20	2	2	1	1	4	4	2	2	1	1	2	1	4	2	35	24	0.6	3个月	2	肠扭转	2	60	3	2	2	1	76	8.5	1	8	2	1天	2	2	1	2
祖奕鸣	2024-06-03	1	1	2	1	3	2	4	1	1	2	2	1	3	2	32	39	3.52	2个月	2	葛西术后感染小肠坏死	6	23	1	3	2	2	63	10.3	2	3	1	2个月	3	2	1	1	1	1	1	1	1	3	30	1	1	3	3	3
娄柚凝	2024-04-25	2	1	1	1	4	4	4	2	1	1	2	1	3	1	26	30	1.38	7天	1	NEC	3	115	3	3	2	1	54	3.03	2	5	1	1天	3	2	1	1	1	1	1	1	1	1	80	3	2	3	2	3
韦希泽	2023-08-06	1	1	2	1	4	4	1	4	1	1	1	1	4	2	33	28	0.83	27天	1	NEC	3	35	2	2	2	1	60	4.4	2	11	2	1天	3	3	1	2
朱筠昊	2024-01-10	1	3	1	1	4	4	1	1	1	2	1	2	3	2	30	40	3.28	1天	1	先天性巨结肠	4	55	3	1	2	1	74	4.8	2	8	2	3天	3	3	1	1	2	2	2	2	2	3	100	1	1	2	1	1
吴虎诚	2023-11-25	1	1	2	1	4	4	1	4	2	1	1	1	3	2	37	30	1.35	1天	1	空肠闭锁	1	55	3	2	2	2	65.5	7	2	10	2	1天	3	3	1	1	2	2	1	1	2	3	50	2	2	2	2	2
郝智贤	2022-12-19	1	3	2	1	4	5	1	1	1	1	1	1	4	2	39	34	1.94	20天	1	先天性短肠	5	35	2	1	2	1	85	11	1	8	2	25天	2	2	1	2
陈岱炘	2023-01-29	1	2	1	1	4	4	2	4	1	1	1	1	4	2	30	38	2.7	1天	1	先天性短肠	5	60	3	2	2	1	79	10	1	15	3	2个月	3	2	1	2
魏苡呈	2023-05-12	1	1	1	1	4	4	2	3	1	1	2	1	4	2	30	37	2.5	1天	1	先天肠闭锁	1	20	1	1	2	2	70	7	1	11	2	1天	3	3	1	2
潘诗禾	2023-05-09	2	1	1	1	3	4	2	3	1	2	1	1	2	2	26	40	2.9	25天	1	NEC	3	60	3	2	2	1	77	9.5	1	5	1	26天	3	2	1	2
许书珵	2023-01-20	2	1	1	1	4	4	2	1	1	1	1	1	3	1	31	37	2	26天	1	NEC	3	65	3	2	2	1	76	11.7	1	11	2	27天	3	3	1	2
李新灿	2022-12-12	1	1	2	1	3	4	2	3	1	1	1	1	4	1	30	37	2.4	11天	1	NEC	3	40	2	4	1	1	84	9.2	2	16	3	2个月	3	3	1	2
王允儿	2023-03-09	2	1	2	1	3	3	2	5	2	2	1	1	2	2	26	39	3.02	3天	1	肠闭锁	1	45	2	1	2	1	78	9	1	6	2	8个月	2	2	1	2
闵臻	2023-07-10	1	2	2	1	5	4	1	4	1	1	1	1	4	1	35	37	3.25	1天	1	先天性巨结肠	4	40	2	3	2	1	83	12	2	15	3	3 天	1	1	1	2
吴忧	2023-12-08	2	1	1	1	4	4	2	1	1	2	1	1	4	2	24	37	3.7	1天	1	肠闭锁	1	80	3	5	1	1	72.6	10.9	1	8	2	3天	2	1	1	1	1	1	1	1	1	1	100	1	1	1	1	1
金易成	2023-02-08	1	2	2	1	5	5	1	4	1	1	1	1	4	1	29	30	1.28	20天	1	NEC	3	80	3	4	1	2	69	7.9	2	19	3	1天	3	3	1	2
王雨泽	2023-12-22	1	1	2	1	3	3	4	1	1	2	2	1	4	1	34	34	2.09	1天	1	胎粪腹膜炎肠扭转	2	20	1	2	2	1	80	7.6	2	14	3	3天	3	2	4	2
张清锐	2022-09-09	1	1	1	1	3	3	2	2	1	1	1	1	3	1	25	33	1.9	1天	1	肠闭锁	1	70	3	2	2	1	82	8.5	1	7	2	1天	3	2	1	2
季昕悦	2023-06-01	2	1	1	1	4	3	2	3	1	1	1	1	3	1	32	38	3.1	1天	1	CIPO	6	80	3	3	2	1	74	9	1	15	3	1天	2	2	1	2
李鹿鸣	2024-06-06	1	1	1	1	4	4	1	2	1	1	1	1	3	2	30	39	3.285	9天	1	肠旋转不良	2	75	3	2	2	1	61	5	2	3	1	9天	3	2	1	1	1	1	1	1	1	1	70	2	2	3	2	2
赵乐瑶	2023-10-09	2	1	1	1	4	4	1	3	1	2	1	1	3	2	25	40	2.84	1天	1	肠闭锁	1	55	3	3	2	1	64	5*9	2	9	2	2天	3	2	1	1	1	1	1	1	1	2	60	3	3	2	3	3
[truncated: 345 more columns]
