# Supplementary material for: Quality of life of children with short bowel syndrome and their caregivers from the perspective of caregivers: a cross-sectional study in China
Source: Research Square preprint supplement (doi:10.21203/rs.3.rs-8216812/v1), 2025-12-05
Supplement: Supplementary file 2 [file b2201bd4ecc982f420b0b5cd.docx]

**eTable 1** Means and standard deviations of PedsQL4.0 GCM total score and scale scores (N = 70)*

| Characteristics | Physical functioning | Emotional functioning | Social functioning | School functioning | Total score |
| --- | --- | --- | --- | --- | --- |
| **Gender** | | | | | |
| Boy (n = 44) | 80.19 (20.68) | 77.50 (17.87) | 72.73 (25.57) | 62.85 (18.04) | 73.81 (15.69) |
| Girl (n = 26) | 84.86 (13.10) | 75.96 (16.43) | 82.88 (15.05) | 76.25 (16.51) | 80.19 (11.94) |
| *p* value | 0.252 | 0.721 | 0.04 | 0.01 | 0.078 |
| **Age** |  |  |  |  |  |
| 2-4years (n = 21) | 84.97 (15.20) | 77.62 (16.33) | 70.71 (23.36) | 72.91 (33.26) | 76.92 (13.87) |
| 5-18years (n = 49) | 80.61 (19.44) | 76.63 (17.78) | 78.98 (22.15) | 33.26 (14.78) | 75.87 (15.11) |
| *P* value | 0.364 | 0.828 | 0.164 | 0.647 | 0.785 |
| **Maternal educational level** | | | | | |
| Middle school or below (n = 14) | 86.39 (14.69) | 76.79 (21.98) | 88.57 (18.86)a | 70.42 (16.30) | 80.65 (15.08) |
| High school or equivalent (n = 4) | 86.72 (8.61) | 83.75 (8.54) | 92.50 (9.57) | 75.00 (5.00) | 85.50 (5.60) |
| College degree or above (n = 52) | 80.35 (19.56) | 76.44 (16.46) | 72.02 (22.78) | 66.76 (19.92) | 74.26 (14.66) |
| *P* value | 0.480 | 0.722 | 0.016 | 0.681 | 0.149 |
| **Paternal educational level** | | | | | |
| Middle school or below (n =13) | 87.02 (14.6) | 72.31 (20.06) | 83.08 (22.22) | 69.55 (16.80) | 78.13 (15.30) |
| High school or equivalent (n = 10) | 79.69 (11.62) | 77.50 (19.76) | 81.50 (18.42) | 61.67 (15.46) | 76.16 (13.80) |
| College or above (n = 47) | 80.99 (20.21) | 78.09 (16.04) | 73.62 (23.44) | 69.22 (19.87) | 75.65 (14.92) |
| *P* value | 0.533 | 0.568 | 0.315 | 0.572 | 0.867 |
| **Annual household income** | | | | | |
| <100,000 (n = 32) | 81.67 (18.69) | 72.97 (18.75) | 76.41 (22.15) | 68.04 (16.97) | 74.35 (15.89) |
| 100,000-200,000 (n = 19) | 82.07 (18.42) | 77.89 (16.86) | 74.21 (21.10) | 68.19 (16.13) | 76.05 (13.3) |
| 200,000-500,000 (n = 16) | 81.84 (19.17) | 82.81 (13.78) | 76.88 (27.56) | 66.42 (22.88) | 77.98 (14.49) |
| >500,000 (n = 3) | 94.79 (4.77) | 81.67 (16.07) | 90.00 (10.00) | 80.00 (28.28) | 86.86 (9.47) |
| *P* value | 0.659 | 0.283 | 0.746 | 0.825 | 0.515 |
| **Employment status** | | | | | |
| Both are employed (n = 45 ) | 81.67 (19.71) | 74.67 (19.14) | 74.11 (23.56) | 68.25 (20.66) | 74.68 (15.72) |
| Only father is employed (n = 21 ) | 80.36 (16.24) | 80.24 (12.89) | 80.71 (20.99) | 69.50 (9.85) | 78.48 (13.06) |
| Only mother is employed ( n = 4 ) | 92.97 (6.44) | 85.00 (10.80) | 81.25 (22.50) | 61.67 (12.58) | 81.03 (8.86) |
| *P* value | 0.450 | 0.302 | 0.503 | 0.816 | 0.497 |
| **Having a sibling or siblings** | | | | | |
| Yes ( n = 41 ) | 79.80 (20.39) | 75.24 (18.71) | 78.66 (21.74) | 68.28 (18.06) | 75.47 (16.03) |
| No ( n = 29 ) | 84.91 (14.61) | 79.31 (14.92) | 73.45 (23.98) | 67.86 (19.57) | 77.18 (12.67) |
| *P* value | 0.226 | 0.335 | 0.356 | 0.937 | 0.634 |
| **Residence** | | | | | |
| Urban(n = 49) | 80.87 (18.97) | 78.37 (16.28) | 75.51 (22.55) | 67.36 (18.87) | 75.96 (14.65) |
| Rural(n = 21) | 84.38 (16.71) | 73.57 (19.31) | 78.81 (23.34) | 69.89 (18.13) | 76.69 (15.04) |
| *P* value | 0.466 | 0.290 | 0.581 | 0.661 | 0.849 |
| **Perceived financial burden** | | | | | |
| Yes (n = 59) | 79.87 (19.11) | 75.68 (18.09) | 73.64 (23.23) | 65.33 (19.12) | 74.23 (15.04) |
| No (n = 11) | 92.89 (5.43) | 83.64 (9.77) | 91.82 (10.55) | 78.18 (12.03) | 86.64 (1.55) |
| *P* value | < 0.01* | 0.161 | < 0.01 | 0.04 | < 0.001 |
| **Receiving social benefits/bonuses/subsidies** | | | | | |
| Yes (n = 24) | 76.69 (20.61) | 74.17 (17.61) | 73.75 (23.79) | 60.94 (16.75) | 72.23 (16.27) |
| No (n = 46) | 84.65 (16.52) | 78.37 (17.06) | 77.93 (22.20) | 71.38 (18.57) | 78.24 (13.47) |
| *P* value | 0.840 | 0.337 | 0.468 | 0.061 | 0.104 |
| **Amount of out-of-pocket expenses** | | | | | |
| < 100,000 (n = 7 ) | 86.16(11.95) | 75.71(15.92) | 84.29(18.80) | 75.00(19.49) | 80.05(8.98) |
| 100,000-200,000 (n = 19 ) | 87.50(16.96) | 81.05(15.33) | 76.05(23.43) | 72.55(12.11) | 79.53(12.38) |
| > 200,000 (n = 44) | 78.84(19.21) | 75.34(18.25) | 75.45(23.12) | 64.50(20.51) | 74.12(16.05) |
| *P* value | 0.184 | 0.480 | 0.636 | 0.246 | 0.313 |
| **Number of operations** | | | | | |
| ≤ 3 (n = 19 ) | 77.30 (20.5) | 71.32 (19.35) | 72.89 (23.53) | 67.77 (15.13) | 72.41 (16.83) |
| > 3 (n = 51 ) | 83.64 (17.38) | 79.02 (16.09) | 77.84 (22.43) | 68.20 (19.61) | 77.58 (13.68) |
| *P* value | 0.199 | 0.097 | 0.421 | 0.945 | 0.192 |
| **Remaining intestine,cm** | | | | | |
| ≤ 50 (n = 39) | 81.57 (20.64) | 76.79 (18.83) | 77.05 (25.90) | 66.40 (21.75) | 75.88 (16.75) |
| > 50 (n = 31) | 82.36 (15.11) | 77.10 (15.32) | 75.81 (18.22) | 71.67 (12.71) | 76.55 (11.77) |
| *P* value | 0.859 | 0.943 | 0.814 | 0.204 | 0.844 |
| **Had an intestinal stoma or PEG tube** | | | | | |
| Yes (n = 4) | 71.88 (7.22) | 68.75 (20.57) | 77.50 (15.00) | 45.00 (7.07) | 69.82 (14.35) |
| No (n = 66) | 82.53 (18.59) | 77.42 (17.08) | 76.44 (23.13) | 69.05 (18.24) | 76.57 (14.69) |
| *P* value | 0.261 | 0.332 | 0.928 | 0.071 | 0.375 |
| **Ileocecal valve retained** | | | | | |
| Yes (n = 44) | 81.96 (17.29) | 77.61 (14.33) | 78.07 (20.69) | 72.87 (14.94) | 77.40 (12.45) |
| No (n = 26) | 81.85 (20.19) | 75.77 (21.57) | 73.85 (25.90) | 56.67 (21.61) | 74.12 (17.87) |
| *P* value | 0.981 | 0.700 | 0.456 | 0.003 | 0.415 |
| **Length of PN therapy, months** |  |  |  |  |  |
| < 6 (n = 21) | 87.95 (12.07) | 78.81 (14.82) | 84.52 (16.50) | 73.25 (13.70) | 81.04 (10.47) |
| 6-12 (n = 29) | 80.71 (18.34) | 79.48 (16.49) | 75.69 (23.44) | 72.30 (13.94) | 76.98 (14.01) |
| >12 (n = 20) | 77.34 (22.34) | 71.25 (19.99) | 69.25 (25.35) | 51.21 (24.69) | 69.91 (17.51) |
| *P* value | 0.161 | 0.219 | 0.093 | 0.002 | 0.046 |
| Wean off PN | | | | | |
| Yes (n = 58) | 83.35 (17.13) | 78.28 (17.51) | 77.24 (23.51) | 68.41 (18.69) | 77.19 (14.43) |
| No (n = 12) | 75.00 (22.61) | 70.42 (14.84) | 72.92 (18.52) | 65.83 (18.55) | 71.32 (15.41) |
| *P* value | 0.151 | 0.152 | 0.551 | 0.753 | 0.209 |
| **Any other structural malformations** | | | | | |
| Yes (n = 10) | 83.49 (17.22) | 77.83 (17.50) | 77.58 (22.56) | 67.61 (18.81) | 69.84 (16.63) |
| No (n = 60) | 72.50 (22.38) | 71.50 (15.28) | 70.00 (23.45) | 71.19 (17.53) | 77.24 (14.18) |
| *P* value | 0.078 | 0.285 | 0.331 | 0.640 | 0.141 |
| **Nutritional status(BMI z-score)** |  |  |  |  |  |
| z-score ≥ -1 (n = 38 ) | 83.06 (18.10) | 76.32 (17.66) | 78.03 (21.45) | 69.38 (15.87) | 77.23 (4.79) |
| -2 ≤ z-score <-1 (n = 19) | 84.71 (15.20) | 78.42 (17.08) | 80.53 (19.07) | 72.31 (18.44) | 79.1(12.61) |
| -3 ≤ z-score <-2 (n = 4) | 82.03 (18.46) | 75.00 (14.72) | 78.75 (11.09) | 70.00 (17.32) | 76.4(14.12) |
| z-score <-3 (n = 9) | 74.18 (23.74) | 77.22 (19.38) | 60.56 (33.21) | 54.29 (25.73) | 65.3 (15.80) |
| *P* value | 0.300 | 0.972 | 0.153 | 0.192 | 0.114 |

Abbreviations: PEG, percutaneous endoscopic gastrostomy; PN, parenteral nutrition; BMI,body mass index

*We only compared the means of children aged 2–18 years in our study in different subgroups.

51 children had already been taken to school.

a Post hoc significance between low maternal educational level and high maternal educational level

**eTable 2** Means and standard deviations of PedsQL 3.0 FIM total score and scale scores (N = 96).

| Characteristics | Physical functioning | Emotional functioning | Social functioning | Cognitive functioning | Communication | Worry | Daily activities | Family relationships | Total score |
| --- | --- | --- | --- | --- | --- | --- | --- | --- | --- |
| **Gender** | | | | | | | | | |
| Boy (n = 61) | 59.49 (24.05) | 59.59 (25.07) | 65.78 (28.34) | 59.59 (24.57) | 69.26 (24.46) | 56.39 (26.35) | 55.46 (27.84) | 67.21 (27.01) | 61.60 (22.08) |
| Girl (n = 35) | 68.10 (19.67) | 70.00 (20.36) | 75.36 (23.72) | 74.71 (17.98) | 74.52 (23.22) | 66.43 (24.09) | 66.43(26.39) | 76.71(17.78) | 71.53 (18.41) |
| *P* value | 0.075 | 0.039 | 0.095 | 0.001 | 0.304 | 0.067 | 0.062 | 0.041 | 0.027 |
| **Age** | | | | | | | | | |
| 1-24months (n = 26) | 49.04 (19.77) | 52.31 (22.55) | 52.64 (28.62) | 57.12 (23.97) | 55.77 (26.64) | 44.04 (24.66) | 45.51 (21.50) | 63.46 (25.64) | 52.49 (20.76) |
| 2-4years (n = 21) | 62.70 (23.07) | 65.24 (21.71) | 72.92 (24.39) | 71.67 (22.21) | 73.02 (18.05) | 71.67 (21.06) | 65.08 (24.67) | 77.86 (23.80) | 70.02 (18.25) |
| 5-18years (n = 49) | 69.81 (21.29) | 68.47 (23.96) | 76.53 (23.68) | 66.53 (23.01) | 78.57 (21.25) | 63.57 (24.77) | 64.46 (29.65) | 71.43 (23.41) | 69.92 (20.28) |
| *P* value | 0.001 | 0.017 | 0.001 | 0.088 | <0.001 | <0.001 | 0.009 | 0.126 | 0.001 |
| **Maternal educational level** | | | | | | | | | |
| Middle school or below (n = 16) | 69.53 (20.05) | 68.13 (28.57) | 73.05 (31.10) | 60.94 (27.03) | 74.48 (22.46) | 58.75 (26.17) | 58.33 (34.96) | 66.25 (28.20) | 66.18 (24.16) |
| High school or equivalent (n = 10) | 55.00 (21.68) | 55.00 (14.14) | 58.75 (21.08) | 54.50 (18.78) | 62.50 (17.24) | 52.00 (19.75) | 58.33 (20.41) | 63.50 (17.49) | 57.45 (16.14) |
| College degree or above (n = 70) | 62.14 (23.43) | 63.50 (23.81) | 69.91 (26.78) | 67.57 (22.95) | 71.67 (25.16) | 61.50 (26.65) | 59.88 (27.12) | 72.71 (24.30) | 66.11 (21.26) |
| *P* value | 0.273 | 0.398 | 0.397 | 0.191 | 0.446 | 0.546 | 0.971 | 0.395 | 0.479 |
| **Paternal educational level** | | | | | | | | | |
| Middle school or below (n = 15) | 65.83 (17.41) | 62.00 (25.55) | 70.83 (27.72) | 57.00 (25.34) | 68.33 (21.87) | 49.67 (23.49) | 52.78 (29.49) | 61.67 (26.38) | 60.89 (21.02) |
| High school or equivalent (n = 15) | 61.95 (21.81) | 61.67 (22.65) | 65.83 (26.40) | 66.00 (23.99) | 72.78 (20.28) | 55.00 (24.79) | 57.78 (30.61) | 73.33 (18.96) | 64.29 (20.40) |
| College or above (n = 66) | 62.06 (24.31) | 64.09 (24.11) | 69.70 (27.35) | 66.74 (22.90) | 71.46 (25.49) | 63.56 (26.16) | 61.36 (26.78) | 72.35 (24.80) | 66.42 (21.68) |
| *P* value | 0.842 | 0.913 | 0.859 | 0.348 | 0.869 | 0.122 | 0.543 | 0.223 | 0.655 |
| **Annual household income** | | | | | | | | | |
| < 100,000 (n = 45) | 63.15 (22.52) | 64.78 (25.65) | 69.03 (27.37) | 62.22 (26.41) | 70.19 (26.08) | 58.22 (26.99) | 56.30 (27.88) | 70.44 (26.73) | 64.29 (21.93) |
| 100,000-200,000 (n = 26) | 61.70 (17.48) | 58.85 (17.57) | 64.42 (26.50) | 61.92 (17.67) | 67.27 (20.55) | 60.00 (23.37) | 59.30 (26.49) | 71.35 (16.59) | 63.23 (18.01) |
| 200,000-500,000 (n = 21) | 63.29 (29.72) | 67.62 (27.96) | 76.19 (27.14) | 73.33 (23.68) | 76.59 (24.81) | 63.57 (26.79) | 64.29 (29.83) | 71.43 (26.37) | 69.54 (24.39) |
| > 500,000 (n = 4) | 59.37 (24.39) | 55.00 (14.72) | 67.19 (28.58) | 75.00 (7.07) | 72.92 (19.69) | 62.50 (32.28) | 70.83 (25.00) | 65.00 (37.19) | 65.98 (20.48) |
| *P* value | 0.984 | 0.530 | 0.530 | 0.218 | 0.679 | 0.889 | 0600 | 0.968 | 0.762 |
| **Employment status** | | | | | | | | | |
| Both are employed (n = 55) | 64.92 (22.60) | 65.82 (21.94) | 73.75 (26.31) | 69.36 (21.37) | 74.24 (23.53) | 62.18 (26.85) | 61.67 (29.29) | 72.82 (22.46) | 68.10 (21.22) |
| Only father is employed (n = 34) | 61.03 (22.49) | 59.41 (27.57) | 63.24 (27.34) | 59.85 (25.39) | 67.89 (22.30) | 55.44 (23.04) | 54.90 (24.80) | 65.29 (26.97) | 60.88 (20.88) |
| Only mother is employed (n = 4) | 61.46 (32.52) | 75.00 (18.71) | 79.69 (24.67) | 66.25 (29.26) | 85.42 (17.18) | 90.00 (4.08) | 79.17 (31.55) | 98.75 (2.5) | 79.47 (16.16) |
| Unemployed (n = 4) | 40.28 (8.67) | 48.33 (2.89) | 41.67 (14.43) | 45(18.3) | 33.33 (28.87) | 33.33 (14.43) | 44.45 (4.81) | 55.00 (8.66) | 42.67 (5.19) |
| *P* value | 0.310 | 0.305 | 0.072 | 0.124 | 0.013 | 0.016 | 0.245 | 0.032 | 0.053 |
| **Having a sibling or siblings** | | | | | | | | | |
| Yes (n = 54) | 62.04 (22.77) | 59.07 (25.14) | 67.71 (27.47) | 61.20 (24.95) | 71.30 (23.66) | 56.02 (26.18) | 56.33 (29.76) | 68.24 (27.87) | 62.74 (22.32) |
| No (n = 42) | 63.39 (23.15) | 68.93 (21.2) | 71.28 (26.63) | 70.12 (20.62) | 71.03 (24.78) | 65.24 (24.84) | 63.49 (24.55) | 73.81 (18.90) | 68.41 (19.63) |
| *P* value | 0.774 | 0.044 | 0.523 | 0.064 | 0.958 | 0.083 | 0.210 | 0.247 | 0.196 |
| **Residence** | | | | | | | | | |
| Urban (n = 66) | 61.55 (24.11) | 62.95 (22.55) | 68.66 (27.33) | 66.52 (21.16) | 70.83 (24.90) | 60.15(25.46) | 59.72 (26.01) | 71.36 (22.68) | 65.22 (20.82) |
| Rural (n = 30) | 65.00 (19.9) | 64.33 (27.00) | 70.63 (26.73) | 62.00 (28.03) | 71.94 (22.16) | 59.83(27.21) | 58.89(31.56) | 69.17 (28.17) | 65.22 (22.58) |
| *P* value | 0.496 | 0.795 | 0.741 | 0.385 | 0.835 | 0.956 | 0.892 | 0.685 | 0.999 |
| **Perceived financial burden** | | | | | | | | | |
| Yes (n = 83) | 60.39 (22.56) | 61.45 (24.49) | 66.34 (27.36) | 62.23 (23.65) | 68.88 (24.49) | 56.90 (25.39) | 55.82 (26.85) | 68.37 (24.87) | 62.56 (21.11) |
| No (n = 13) | 76.92 (19.74) | 75.77 (15.12) | 87.98 (14.98) | 83.46 (10.68) | 85.90 (14.19) | 79.62 (20.46) | 82.69 (21.64) | 85.38 (14.64) | 82.22 (13.18) |
| *P* value | 0.014 | 0.008 | <0.01 | <0.01 | 0.017 | 0.003 | 0.001 | 0.019 | ＜0.01 |
| **Receiving social benefits/bonuses/subsidies** | | | | | | | | | |
| Yes (n = 35) | 56.91 (24.06) | 58.71 (26.27) | 63.21 (27.74) | 58.86 (25.84) | 64.29 (28.77) | 50.57 (27.81) | 52.62 (29.48) | 64.00 (24.88) | 58.65 (23.25) |
| No (n = 61) | 65.92 (21.60) | 66.07 (22.19) | 72.75 (26.20) | 68.69 (21.39) | 75.14 (20.04) | 65.49 (23.23) | 63.39 (26.06) | 74.51 (23.47) | 68.99 (19.24) |
| *P* value | 0.062 | 0.148 | 0.096 | 0.048 | 0.054 | 0.006 | 0.066 | 0.042 | 0.021 |
| **Amount of out-of-pocket expenses** | | | | | | | | | |
| < 100,000 (n = 10) | 65.00 (19.27) | 67.00 (15.31) | 78.75 (19.81) | 74.50 (17.07) | 79.17 (19.74) | 66.50 (20.69) | 65.83 (22.37) | 79.00 (15.42) | 71.97 (14.62) |
| 100,000-200,000 (n= 29) | 67.10 (24.00) | 66.21 (22.31) | 71.12 (28.66) | 68.97 (18.82) | 68.39 (25.91) | 62.07 (24.18) | 65.23 (26.26) | 73.10 (19.29) | 67.77 (21.66) |
| > 200,000 (n = 57) | 59.94 (22.75) | 61.32 (25.90) | 66.67 (27.20) | 61.49 (25.94) | 71.20 (23.78) | 57.89 (27.58) | 55.41 (28.89) | 67.98 (27.61) | 62.73 (21.92) |
| *P* value | 0.370 | 0.593 | 0.392 | 0.154 | 0.478 | 0.556 | 0.224 | 0.346 | 0.336 |
| **Number of operations** | | | | | | | | | |
| ≤ 3 (n = 22) | 58.14 (25.28) | 57.50 (28.65) | 64.77 (27.79) | 61.82 (32.31) | 71.97 (28.35) | 55.91 (27.41) | 50.38 (30.91) | 64.77 (30.57) | 60.66 (24.87) |
| ＞3 (n = 74) | 63.96 (22.05) | 65.14 (22.21) | 70.61 (26.83) | 66.08 (20.29) | 70.95 (22.80) | 61.28 (25.47) | 62.16 (26.29) | 72.43 (22.18) | 66.58 (20.06) |
| *P* value | 0.296 | 0.190 | 0.377 | 0.563 | 0.862 | 0.395 | 0.080 | 0.198 | 0.254 |
| **Remaining intestine,cm** | | | | | | | | | |
| ≤ 50 (n = 49) | 63.78 (22.70) | 67.45 (21.92) | 73.47 (25.15) | 65.92 (23.15) | 76.36 (21.34) | 59.80 (25.33) | 60.71 (27.74) | 73.98 (22.24) | 67.68 (19.30) |
| > 50 (n = 47) | 61.44 (23.14) | 59.15 (25.33) | 64.89 (28.45) | 64.26 (24.00) | 65.78 (25.67) | 60.32 (26.71) | 58.16 (27.88) | 67.23 (26.25) | 62.65 (23.06) |
| *P* value | 0.618 | 0.089 | 0.121 | 0.730 | 0.03 | 0.922 | 0.653 | 0.177 | 0.249 |
| **Length of PN therapy, months** | | | | | | | | | |
| < 6 (n = 28) | 68.45 (20.80) | 68.21 (20.96) | 76.12 (27.69) | 71.79 (17.70) | 75.60(26.15) | 62.86 (28.53) | 67.26 (27.30) | 75.18 (21.75) | 70.68 (21.07) |
| 6-12 (n = 42) | 61.90 (22.93) | 63.93 (26.15) | 70.83 (26.47) | 64.17 (22.74) | 71.63(21.70) | 60.48 (23.89) | 59.92 (24.91) | 71.19 (22.25) | 65.51 (20.14) |
| > 12 (n = 26) | 57.53 (24.18) | 57.31 (22.55) | 59.38 (25.26) | 59.42 (28.65) | 65.71(25.09) | 56.35 (26.59) | 50.32 (30.59) | 65.00 (29.70) | 58.88 (22.32) |
| *P* value | 0.207 | 0.243 | 0.065 | 0.145 | 0.318 | 0.651 | 0.078 | 0.307 | 0.124 |
| **Wean off PN** | | | | | | | | | |
| Yes (n = 70) | 64.94 (23.18) | 66.50 (24.63) | 73.39 (25.71) | 66.86 (22.25) | 74.05 (22.68) | 63.64 (25.14) | 64.05 (26.75) | 72.50 (24.56) | 68.24 (20.88) |
| No (n = 26) | 56.41 (21.02) | 55.00 (19.85) | 58.17 (27.83) | 60.38 (26.34) | 63.46 (26.26) | 50.38 (25.84) | 47.12 (26.87) | 65.77 (24.28) | 57.09 (20.50) |
| *P* value | 0.104 | 0.022 | 0.013 | 0.232 | 0.055 | 0.025 | 0.007 | 0.232 | 0.022 |
| **Had an intestinal stoma or PEG tube** | | | | | | | | | |
| Yes (n = 9) | 57.87 (17.61) | 60.56 (17.04) | 54.86 (29.28) | 72.22 (17.87) | 66.67 (31.73) | 53.89 (25.47) | 37.96 (21.70) | 70.00 (13.69) | 59.25 (15.95) |
| No (n = 87) | 63.12 (23.33) | 63.68 (24.55) | 70.76 (26.51) | 64.37 (23.93) | 71.65 (23.28) | 60.69 (25.98) | 61.69 (27.39) | 70.75 (25.30) | 65.84 (21.72) |
| *P* value | 0.514 | 0.711 | 0.093 | 0.342 | 0.557 | 0.456 | 0.014 | 0.931 | 0.379 |
| **Ileocecal valve retained** | | | | | | | | | |
| Yes (n = 57) | 64.69 (22.59) | 67.02 (23.30) | 74.67 (24.48) | 69.39 (21.24) | 74.42 (23.14) | 62.63 (25.43) | 64.18 (25.34) | 72.46 (23.13) | 68.68 (19.77) |
| No (n = 39) | 59.62 (23.12) | 58.08 (24.05) | 61.38 (28.89) | 58.85 (25.38) | 66.45 (24.81) | 56.28 (26.40) | 52.56 (29.81) | 68.08 (26.22) | 60.16 (22.60) |
| *P* value | 0.289 | 0.072 | 0.017 | 0.030 | 0.111 | 0.240 | 0.043 | 0.390 | 0.053 |
| **Any other structural malformations** | | | | | | | | | |
| Yes (n = 82) | 63.72 (22.52) | 65.24 (22.93) | 70.81 (26.61) | 66.59 (22.37) | 71.44 (23.32) | 60.85 (25.13) | 61.28 (26.91) | 72.13 (22.95) | 66.51 (20.43) |
| No (n = 14) | 56.25 (24.39) | 52.50 (27.30) | 60.27 (28.65) | 56.43 (28.45) | 69.64 (28.80) | 55.36 (30.54) | 48.81 (30.81) | 62.14 (31.24) | 57.67 (25.14) |
| *P* value | 0.260 | 0.065 | 0.179 | 0.135 | 0.797 | 0.466 | 0.120 | 0.158 | 0.152 |
| **Nutritional status(BMI z-score)** |  |  |  |  |  |  |  |  |  |
| z-score ≥ -1 (n = 51) | 60.95 (25.03) | 62.45 (24.50) | 70.22 (27.26) | 66.57 (25.23) | 70.75 (26.63) | 60.49 (24.25) | 57.68 (29.20) | 71.76 (24.45) | 65.11 (22.01) |
| -2 ≤ z-score <-1 (n = 21) | 67.66 (19.58) | 70.24 (19.78) | 72.02 (26.12) | 69.29 (16.90) | 78.17 (19.98) | 66.43 (26.93) | 63.89 (28.67) | 70.71 (21.98) | 69.80 (18.99) |
| -3 ≤ z-score <-2 (n = 8) | 60.94 (18.22) | 60.63 (23.06) | 59.38 (31.87) | 64.38 (18.41) | 67.71 (22.90) | 47.50 (38.73) | 55.21 (30.84) | 66.88 (29.02) | 60.33 (23.66) |
| z-score <-3 (n = 16) | 62.24 (22.33) | 58.75 (27.36) | 67.58 (26.34) | 55.31 (26.30) | 65.10 (27.25) | 56.56 (21.43) | 61.46 (20.61) | 69.06 (26.91) | 62.01 (21.31) |
| *P* value | 0.725 | 0.479 | 0.708 | 0.304 | 0.399 | 0.329 | 0.802 | 0.949 | 0.629 |

Abbreviations: PEG, percutaneous endoscopic gastrostomy; PN, parenteral nutrition; BMI,body mass index；FIM, Family Impact Module.
